# Supplementary material
Source: publisher site journal article supplement (https://www.dovepress.com/get_supplementary_file.php?f=424711.docx)
Supplement: Supplementary file 1 [file get_supplementary_file.php]

**Supplementary Table 1: Interview framework for Hospital Leaders and Managers**

| **Category** | **Content** |
| --- | --- |
| **Leadership Management** | 1.1 Tell us about the organizational structure of your hospital.  1.2 Could you provide some insights into the experiences of the President's responsibility system under the leadership of the CPC Committee* in your hospital?  1.3 What do you consider about the operational philosophy and experiences of your hospital?  *President's responsibility system under the leadership of the CPC Committee: In China, the CPC committee can be understood as "board of directors" of foreign hospitals; the secretary of the party committee can be understood as the "chairman," and the president can be understood as the "CEO." |
| **Cultural Development** | 2.1 Tell us the mission, vision and value of your hospital.  2.2 How does your hospital utilize cultural development to motivate medical staff? |
| **Strategic Management** | 3.1 How does your institution formulate those strategies for the future development and operation of the hospital?  3.2 What are the **key success factors** that have contributed to the success of your hospital? |
| **Customer Management** | 4.1 How does your hospital develop a patient-centered culture to enhance patient trust, reputation, and satisfaction?  4.2 What other key practices targeting patient does your hospital have in place to improve hospital operational performance? |
| **Innovation Management** | 5.1 Tell us about the innovative features of your hospital (such as in medical care, services, technological research and development, etc.)  5.2How does your hospital utilize information management (such as big data) for medical quality and patient safety management? |
| **Workforce Management** | 6.1 Introduce about the educational environment and system in your hospital for staff learning and growth.  6.2 How does your hospital manage employee relations to enhance staff cohesion and productivity?  6.3 What other specific approaches and performance schemes utilized in your hospital apart from employee-centered practices? |
| **Operation Management** | 7.1 How do your hospital implement medical service process management？  7.2 What process management (Delicacy Management) methods utilized in your hospital to ensure medical quality and patient safety? |
| **Performance Management** | 1. Among the above-mentioned points, what do you consider to be the most important factors for hospital performance improvement? (Please provide a brief explanation.) |
